# Supplementary material for: Clinical Utility of the Tokyo Guidelines 2018 for Acute Cholangitis in the Emergency Department and Comparison with Novel Markers (Neutrophil-to-Lymphocyte and Blood Nitrogen Urea-to-Albumin Ratios)
Source: MDPI journal article supplement (doi:10.3390/jcm13082306), 2024-04-16
Supplement: s1 [file s1]

**Supplement Table S1.** Comparison of ERCP status in patients according to BAR, NLR, CRP, and TG2018.

| Factor | ERCP                |                   | p     |
|--------|---------------------|-------------------|-------|
|        | No (n=155)          | Yes (n=325)       |       |
| BAR    | 4.09 (1.12-111.11)  | 3.73 (1.00-24.37) | 0.006 |
| NLR    | 10.04 (0.95-194.20) | 9.59 (0.67-88.45) | 0.866 |
| CRP    | 4.72 (0.04-26.15)   | 2.92 (0.03-31.02) | 0.035 |
| TG2018 | 2 (1-3)             | 1 (1-3)           | 0.102 |

Abbreviations: ERCP; Endoscopic retrograde choangiopancreatography, BAR; blood urea nitrogen to albumin ratio, NLR; neutrophil to lymphocyte ratio, CRP; c-reactive protein, TG2018; tokyo guideline 2018,.

**Supplement Table S2.** Comparison of clinical outcomes according to TG2018 grade.

|                          | Grade 1 (n=254) | Grade 2 (n=120) | Grade 3 (n=108) | P     |
|--------------------------|-----------------|-----------------|-----------------|-------|
| Intensive care           | 8 (3.1%)        | 12 (10.0%)      | 61 (56.5%)      | 0.000 |
| Long-term hospital stays | 33 (13.0%)      | 30 (25.0%)      | 48 (44.4%)      | 0.000 |
| PTBD                     | 17 (6.7%)       | 9 (7.5%)        | 23 (21.3%)      | 0.000 |
| Endotracheal intubation  | 1 (0.4%)        | 0               | 13 (12.0%)      | 0.000 |

Abbreviations: PTBD; percutaneous transhepatic bile drainage

**Supplement Table S3.** Comparison of BAR, NLR, CRP according to TG2018 grade.

|     | Grade 1 (n=254)   | Grade 2 (n=120)    | Grade 3 (n=108)     | P     |
|-----|-------------------|--------------------|---------------------|-------|
| BAR | 3.24 (1.00-24.37) | 4.33 (1.47-23.82)  | 6.34 (1.23-111.11)  | 0.000 |
| NLR | 6.74 (0.76-79.92) | 12.74 (0.67-81.33) | 15.66 (0.81-194.20) | 0.000 |
| CRP | 1.16 (0.03-26.15) | 5.61 (0.11-30.14)  | 7.53 (0.03-31.02)   | 0.000 |

Abbreviations: BAR; blood urea nitrogen to albumin ratio, NLR; neutrophil to lymphocyte ratio, CRP; c-reactive protein,
